# Supplementary material
Source: Springer Nature journal article supplement (https://www.springermedizin.de/resource/supplementary/12968_2013_3357_MOESM8_ESM.pdf/9583488)
Supplement: MOESM8 [file 9583488]

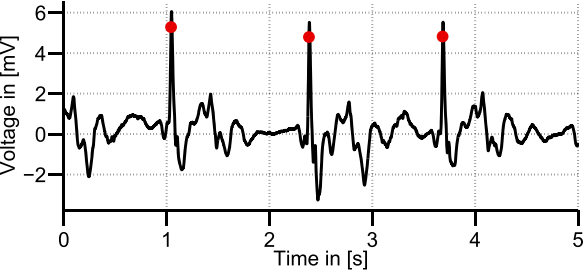

(a) IC used for gating

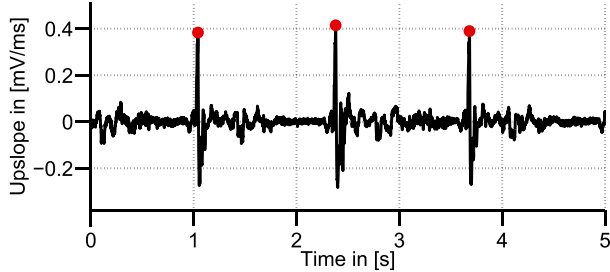

(b) First derivative of (a)

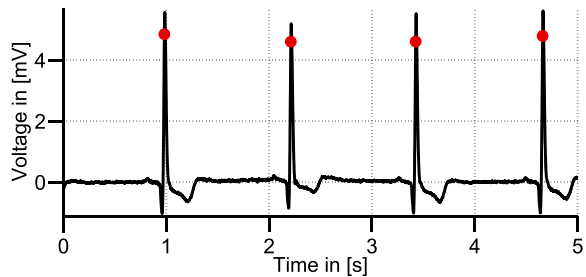

(c) IC from the ECG acquired outside the MR scanner

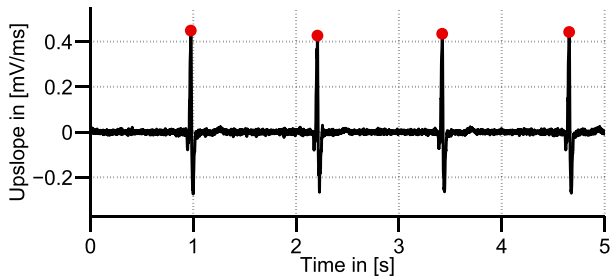

(d) First derivative of (c)
